# Supplementary material for: Gas exchange and dive characteristics of the free-swimming backswimmer Anisops deanei
Source: Oxford University Press journal article supplement (doi:10.1242/jeb.125047), 2015-11-01
Supplement: jeb125047supp.pdf [file jeb125047supp.pdf]

**Table S1. Variables and constants used in the mathematical model.**

| Variable                         | Value                 | Units                                       | Reference |
|----------------------------------|-----------------------|---------------------------------------------|-----------|
| $P_b$                            | 101.3                 | kPa                                         | 1         |
| $\rho_{\text{air}}$              | $1.20 \times 10^{-3}$ | mg $\mu\text{l}^{-1}$                       |           |
| $P_{\text{H}_2\text{O}}$         | 2.34                  | kPa                                         | 2         |
| $P_{\text{N}_2,\text{aq}}$       | 78.12                 | kPa                                         | 2         |
| $P_{\text{O}_2,\text{aq}}$       | 20.73                 | kPa                                         | 2         |
| $K_{\text{O}_2}$                 | $6.96 \times 10^{-7}$ | $\text{mm}^2 \text{s}^{-1} \text{kPa}^{-1}$ | 3         |
| $K_{\text{N}_2}$                 | $3.18 \times 10^{-7}$ | $\text{mm}^2 \text{s}^{-1} \text{kPa}^{-1}$ | 3         |
| $K_{\text{He}}$                  | $4.91 \times 10^{-7}$ | $\text{mm}^2 \text{s}^{-1} \text{kPa}^{-1}$ | 3         |
| $K_{\text{SF}_6}$                | $8.18 \times 10^{-8}$ | $\text{mm}^2 \text{s}^{-1} \text{kPa}^{-1}$ | 3         |
| $A$                              | 1.87                  | $\text{mm}^2$                               | 4         |
| $a$                              | 1.13                  | mm                                          | 4         |
| $b$                              | 0.42                  | mm                                          | 4         |
| $c$                              | 0.22                  | mm                                          | 4         |
| $M_b$                            | 10.18                 | mg                                          | 4         |
| $V_{\text{B, init}}$             | 0.867                 | $\mu\text{l}$                               | 5         |
| $V_{\text{bs}}$                  | 9.44                  | $\mu\text{l}$                               | 5         |
| $V_{\text{O}_2,\text{hb}}$       | 0.25                  | $\mu\text{l}$                               | 5         |
| $P_{50}$                         | 3.90                  | kPa                                         | 6         |
| $P_{\text{O}_2,\text{crit}}$     | 2.0                   | kPa                                         | 7         |
| $\dot{V}_{\text{O}_2,\text{MR}}$ | $2.17 \times 10^{-3}$ | $\mu\text{l s}^{-1}$                        | 4         |
| $X$                              | 0.04, 0.10, 0.60      | mm                                          | 3, 1      |

References: 1, Seymour and Matthews, 2013; 2, Dejours 1981; 3, Rahn and Paganelli, 1968; 4, present study; 5 Matthews and Seymour, 2008; 6, Matthews and Seymour, 2011; 7, Matthews and Seymour 2010. Symbols:  $P_b$  = barometric pressure,  $\rho_{\text{air}}$  = air density,  $P_g$  = pressure of relevant gas,  $K_g$  = Krogh's coefficient of diffusion of relevant gas,  $A$  = surface area for gas exchange,  $a, b, c$  = ellipsoid semi-axis values as described in results,  $M_b$  = backswimmer body mass,  $V_{\text{B, init}}$  = initial bubble volume,  $V_{\text{bs}}$  = backswimmer volume,  $V_{\text{O}_2,\text{hb}}$  = initial  $\text{O}_2$  volume bound to haemoglobin,  $P_{50}$  =  $P_{\text{O}_2}$  at which haemoglobin is 50% saturated,  $P_{\text{O}_2,\text{crit}}$  = critical  $P_{\text{O}_2}$ ,  $\dot{V}_{\text{O}_2,\text{MR}}$  =  $\text{O}_2$  consumption rate,  $X$  = boundary layer thickness.

**Table S2. Mathematical model used to simulate the decline in backswimmer buoyancy and air store  $PO_2$  during dives.** The model has the following assumptions: (1) surface area for gas exchange ( $A$ ) is defined as the surface area of a half-ellipsoid with semi-axes  $a$ ,  $b$  and  $c$ , defined in the results and supplementary Table S1, (2) conductance of each gas remains constant throughout each simulation at a level defined by Fick's law as the Krogh's coefficient ( $K_g$ ) multiplied by the quotient of  $A$  and the boundary layer thickness ( $X$ ) (Rahn and Paganelli, 1968; Matthews and Seymour, 2010; supplementary material Table S1), (3) the insect is considered to be just below the water's surface where hydrostatic pressure is negligible and is thus not included (Seymour and Matthews, 2013), (4) bubble surface tension is not included due to its minimal impact on total bubble pressure (Seymour and Matthews, 2013), (5)  $CO_2$  production by the insect is excluded as  $CO_2$  diffuses readily into the water surrounding the air store (Ege, 1915; Rahn and Paganelli, 1968), (6) barometric pressure and temperature are constant at 101.3 kPa and 20°C, respectively, (7) water is well-mixed and in equilibrium with atmospheric gas compositions:  $PO_2$  of 20.73 kPa and  $P_{N_2}$  of 78.12 kPa (Dejours, 1981; Rahn and Paganelli, 1968), and (8) initial air store composition considers trace gases as part of the  $N_2$  fraction (Dejours, 1981; Rahn and Paganelli, 1968). The equations relating to the  $O_2$  release from the haemoglobin ( $\dot{V}_{O_{2,hb}}$ ), and haemoglobin saturation curves, are outlined in Matthews and Seymour (2011), with values for the  $P_{50}$  and  $O_2$  volume stored in haemoglobin ( $V_{O_{2,hb}}$ ) shown in Table S1 of the supplementary material. Density of the insect with the bubble was calculated as the sum of bubble mass (= air density  $\times$  bubble volume,  $\rho_{air} \times V_b$ ) and body mass ( $M_b$ ), divided by the sum of bubble volume and body volume ( $V_{bs}$ ) (supplementary material Table S1).

| Equation |                                                                                                                       | Description                                                                                                                                                                                                                                                                                                                                                                                                                                                                                                                                                                                                     |
|----------|-----------------------------------------------------------------------------------------------------------------------|-----------------------------------------------------------------------------------------------------------------------------------------------------------------------------------------------------------------------------------------------------------------------------------------------------------------------------------------------------------------------------------------------------------------------------------------------------------------------------------------------------------------------------------------------------------------------------------------------------------------|
| (1)      | $\dot{V}_g = K_g \frac{A}{X} (\Delta P_g)$                                                                            | Fick's law describes diffusion of $N_2$ out of the air store and $O_2$ in, where $\dot{V}_g$ is the rate of change in volume of a particular gas species ( $\mu l s^{-1}$ ), $K_g$ is the Krogh's coefficient ( $mm^2 s^{-1} kPa^{-1}$ ), which is the product of capacitance ( $\beta$ ; $mm^3 mm^{-3} kPa^{-1}$ ) and diffusivity ( $D$ ; $mm^2 s^{-1}$ ), $A$ is surface area available for gas exchange ( $mm^2$ ), $X$ is thickness of the effective boundary layer ( $mm$ ), and $\Delta P_g$ is the difference between the pressure of the relevant gas species inside and outside the bubble ( $kPa$ ). |
| (2)      | $V_b(t) = V_b(t - dt) + (\dot{V}_{O_{2,hb}} + \dot{V}_{O_{2,H_2O}} - \dot{V}_{O_2} - \dot{V}_{N_{2,H_2O}}) \times dt$ | Differential Eq. 2 describes the change in bubble volume ( $V_b$ ; $\mu l$ ) over time ( $t$ ; $s$ ), where $V_b(t)$ is bubble volume at time $t$ , $\dot{V}_{O_{2,hb}}$ ( $\mu l s^{-1}$ ) is the rate of $O_2$ release from the haemoglobin (hb), $\dot{V}_{O_{2,H_2O}}$ ( $\mu l s^{-1}$ ) is the                                                                                                                                                                                                                                                                                                            |

|       |                                                                                                             |                                                                                                                                                                                                                                                                                                                                                                                                                                                                                                                                                                                                                                                                                                            |
|-------|-------------------------------------------------------------------------------------------------------------|------------------------------------------------------------------------------------------------------------------------------------------------------------------------------------------------------------------------------------------------------------------------------------------------------------------------------------------------------------------------------------------------------------------------------------------------------------------------------------------------------------------------------------------------------------------------------------------------------------------------------------------------------------------------------------------------------------|
|       |                                                                                                             | rate of O <sub>2</sub> diffusion from the surrounding water, $\dot{V}_{O_2}$ (μl s <sup>-1</sup> ) is the O <sub>2</sub> consumption rate by the backswimmer, and $\dot{V}_{N_2,H_2O}$ (μl s <sup>-1</sup> ) is the rate of N <sub>2</sub> loss to the surrounding water.                                                                                                                                                                                                                                                                                                                                                                                                                                  |
| (3.1) | $\dot{V}_{O_2} = P_{O_{2, in}} \times 0.0011$                                                               | When air store $P_{O_2}$ ( $P_{O_{2, in}}$ ; kPa) drops below the critical $P_{O_2}$ ( $P_{O_{2, crit}}$ ) of 2 kPa, based on measurements from water boatmen (Matthews and Seymour, 2010), the backswimmer's O <sub>2</sub> consumption rate ( $\dot{V}_{O_2}$ ) is dependent on $P_{O_{2, in}}$ (Eq. 5), and is described by Eq. 3.1. The slope of decline in $\dot{V}_{O_{2, MR}}$ (= 0.0011) is the experimentally measured O <sub>2</sub> consumption rate (μl s <sup>-1</sup> ; supplementary material Table S1) from 0 to 2 kPa. However, when $P_{O_{2, in}}$ is greater than the assumed $P_{O_{2, crit}}$ , backswimmer $\dot{V}_{O_2}$ is independent of $P_{O_{2, in}}$ , and Eq. 3.2 applies. |
| (3.2) | $\dot{V}_{O_2} = \dot{V}_{O_{2, MR}}$                                                                       |                                                                                                                                                                                                                                                                                                                                                                                                                                                                                                                                                                                                                                                                                                            |
| (4)   | $P_{O_2} = \left( \frac{\dot{V}_{O_{2, flux}}}{V_b(t)} \right) \times (P_b - P_{H_2O})$                     | The incremental change in bubble $P_{O_2}$ (kPa s <sup>-1</sup> ) is described by Eq. 4, where $\dot{V}_{O_{2, flux}}$ (μl s <sup>-1</sup> ) incorporates the various O <sub>2</sub> fluxes (i.e. $\dot{V}_{O_{2, H_2O}} + \dot{V}_{O_{2, hb}} - \dot{V}_{O_2}$ ), $V_b(t)$ is bubble volume (μl) at time $t$ , $P_b$ is barometric pressure (kPa), and $P_{H_2O}$ is water vapour pressure (kPa).                                                                                                                                                                                                                                                                                                         |
| (5)   | $P_{O_{2, in}}(t) = P_{O_{2, in}}(t - dt) + (P_{O_2}) \times dt$                                            | The $P_{O_2}$ within the air store ( $P_{O_{2, in}}$ ; kPa) is described by a second differential equation.                                                                                                                                                                                                                                                                                                                                                                                                                                                                                                                                                                                                |
| (6)   | $P_{N_2 in} = P_b - P_{O_{2 in}} - P_{H_2O}$                                                                | $P_{N_2}$ within the air store ( $P_{N_{2, in}}$ ; kPa) relates to Dalton's law.                                                                                                                                                                                                                                                                                                                                                                                                                                                                                                                                                                                                                           |
| (7)   | $A = \left( 4\pi \left( \frac{(ab)^{1.6} + (ac)^{1.6} + (bc)^{1.6}}{3} \right)^{\frac{1}{1.6}} \right) / 2$ | Surface area for gas exchange ( $A$ , mm <sup>2</sup> ) is defined as the approximate equation for the surface area of half an ellipsoid with semi-axes $a$ , $b$ and $c$ (mm; defined in supplementary material Table S1).                                                                                                                                                                                                                                                                                                                                                                                                                                                                                |

**Dejours, P.** (1981). Principles of Comparative Respiratory Physiology. Amsterdam, Netherlands: Elsevier/North-Holland Biomedical Press.

**Ege, R.** (1915). On the respiratory function of the air stores carried by some aquatic insects (Corixidae, Dytiscidae and Notonecta). *Zeitschrift für Allgemeine Physiologie* **17**, 81-125.

**Matthews, P. G. D. and Seymour, R. S.** (2008). Haemoglobin as a buoyancy regulator and oxygen supply in the backswimmer (Notonectidae, *Anisops*). *Journal of Experimental Biology* **211**, 3790-3799.

**Matthews, P. G. D. and Seymour, R. S.** (2010). Compressible gas gills of diving insects: measurements and models. *Journal of Insect Physiology* **56**, 470-479.

**Matthews, P. G. D. and Seymour, R. S.** (2011). Oxygen binding properties of backswimmer (Notonectidae, *Anisops*) haemoglobin, determined *in vivo*. *Journal of Insect Physiology* **57**, 1698-1706.

**Rahn, H. and Paganelli, C. V.** (1968). Gas exchange in gas gills of diving insects. *Respiration Physiology* **5**, 145-164.

**Seymour, R. S. and Matthews, P. G. D.** (2013). Physical gills in diving insects and spiders: theory and experiment. *Journal of Experimental Biology* **216**, 164-170.
